# Supplementary material for: CONFORMATION STUDY OF EPHEDRINE AND 2-PHENYLETHANOL AND THEIR HYDRATED CLUSTERS BY MASS SELECTIVE HIGH-RESOLUTION UV SPECTROSCOPY AND AB INITIO CALCULATIONS
Source: Hindawi journal article supplement (doi:10.1155/2018/4280343), 2005-01-01
Supplement: f1 [file 4280343.f1.pdf]

## Supplementary materials

Table S1. Body weight of the four groups.

| Group | N | 0w        | 1w         | 2w                       | 3w                       | 4w                        |
|-------|---|-----------|------------|--------------------------|--------------------------|---------------------------|
| C     | 6 | 73.7±6.7  | 137.2±11.6 | 186.0±13.4               | 250.9±9.9                | 303.8±13.4                |
| H     | 6 | 72.9±4.2  | 133.2±10.9 | 157.6±12.7 <sup>ab</sup> | 209.2±20.8 <sup>ef</sup> | 235.0±19.0 <sup>hij</sup> |
| M     | 6 | 78.2±10.8 | 129.0±7.5  | 161.9±8.8 <sup>cd</sup>  | 223.8±14.8 <sup>g</sup>  | 256.2±9.0 <sup>kl</sup>   |
| L     | 6 | 76.3±8.6  | 135.8±10.7 | 176.5±12.2               | 238.1±11.0               | 273.8±10.8 <sup>m</sup>   |

<sup>a</sup> P=0.001, <sup>c</sup> P=0.002, <sup>e</sup> P=0, <sup>g</sup> P=0.005, <sup>h</sup> P=0, <sup>k</sup> P=0, <sup>m</sup> P=0.001, compared with group C. <sup>b</sup> P=0.013, <sup>d</sup> P=0.047, <sup>f</sup> P=0.003, <sup>i</sup> P=0, <sup>l</sup> P=0.037, compared with group L. <sup>j</sup> P=, 0.014, compared with group M.

Table S2. Food consumption and Water intake of the four groups.

| Group | N | Food consumption (g)     | Water intake (ml)         |
|-------|---|--------------------------|---------------------------|
| C     | 6 | 26.51±1.09               | 34.08±2.633               |
| H     | 6 | 21.79±1.55 <sup>a</sup>  | 64.76±3.29 <sup>f</sup>   |
| M     | 6 | 23.48±1.49 <sup>bc</sup> | 57.02±3.53 <sup>ghi</sup> |
| L     | 6 | 24.29±1.56 <sup>de</sup> | 44.88±2.86 <sup>k</sup>   |

<sup>b</sup> P=0.037, <sup>d</sup> P=0.003, <sup>g,j</sup> P=0, compared with group H. <sup>a</sup> P=0, <sup>c</sup> P=0.001, <sup>e</sup> P=0.008, <sup>f,h,k</sup> P=0, <sup>i</sup> P<0.01, compared with group C. <sup>i</sup> P=0, compared with group L.

Table S3. Diarrhea of the four groups.

| Group | N | Bristol score |                          | Fecal grains |                           |
|-------|---|---------------|--------------------------|--------------|---------------------------|
|       |   | 0w            | 4w                       | 0w           | 4w                        |
| C     | 6 | 3.42±0.11     | 3.92±0.28                | 4.83±1.17    | 5.83±1.47                 |
| H     | 6 | 3.44±0.14     | 5.89±0.23 <sup>abc</sup> | 4.67±1.21    | 26.83±2.14 <sup>ghi</sup> |
| M     | 6 | 3.40±0.13     | 5.34±0.33 <sup>de</sup>  | 4.33±1.03    | 22.50±3.27 <sup>jk</sup>  |
| L     | 6 | 3.37±0.07     | 4.59±0.36 <sup>f</sup>   | 4.50±1.05    | 16.17±4.47 <sup>l</sup>   |

<sup>a, d, f, g, j, l</sup> P=0, compared with group C. <sup>b, h, k</sup> P=0, <sup>e</sup> P=0.002, compared with group L. <sup>c</sup> P=0.005, <sup>i</sup> P=0.023, compared with group M.

Table S4. Physical activities of the four groups.

| Group | N | WLFST (s)    |                            | FGST (g)     |                              |
|-------|---|--------------|----------------------------|--------------|------------------------------|
|       |   | 0w           | 4w                         | 0w           | 4w                           |
| C     | 6 | 258.37±85.98 | 651.83±100.19              | 494.67±52.23 | 1507.92±103.94               |
| H     | 6 | 269.13±70.83 | 448.66±82.67 <sup>ab</sup> | 506.89±63.49 | 1244.53±113.53 <sup>de</sup> |
| M     | 6 | 253.35±78.80 | 528.27±94.52 <sup>c</sup>  | 505.57±67.48 | 1362.76±114.66 <sup>f</sup>  |
| L     | 6 | 251.98±83.81 | 570.75±105.12              | 513.67±47.54 | 1462.17±102.27               |

<sup>a</sup> P=0.002, <sup>c</sup> P=0.037, <sup>d</sup> P=0, <sup>f</sup> P=0.032, compared with group C. <sup>b</sup> P=0.039, <sup>e</sup> P=0.002, compared with group L. WLFST, weight-loaded forced swimming test. FGST, forelimb grip strength test.

Table S5. Hormone level and serum D-xylose content

| Group | N | ACTH(pg/ml) | Cortisone(ng/ml) | 17-OHCS(ng/ml) | D-xylose(mmol/L) |
|-------|---|-------------|------------------|----------------|------------------|
|-------|---|-------------|------------------|----------------|------------------|

|   |   |                           |                          |                         |                         |
|---|---|---------------------------|--------------------------|-------------------------|-------------------------|
| C | 6 | 78.03±12.39               | 46.21±8.83               | 2.18±0.91               | 4.70±0.81               |
| H | 6 | 37.97±10.21 <sup>ab</sup> | 29.34±6.79 <sup>de</sup> | 0.83±0.38 <sup>fg</sup> | 2.95±0.75 <sup>hi</sup> |
| M | 6 | 51.91±10.59 <sup>c</sup>  | 36.80±9.00               | 1.49±0.55               | 3.47±0.71 <sup>j</sup>  |
| L | 6 | 66.34±16.61               | 42.65±9.84               | 1.61±0.61               | 3.97±0.82               |

<sup>a</sup> P=0, <sup>c</sup> P=0.002, <sup>d</sup> P=0.003, <sup>f</sup> P=0.002, <sup>h</sup> P=0.001, <sup>j</sup> P=0.012, compared with group C., <sup>b</sup> P=0.001, <sup>e</sup> P=0.016, <sup>g</sup> P=0.047, <sup>i</sup> P=0.033, compared with group L. ACTH, Adrenocorticotrophic hormone. 17-OHCS, 17-hydroxycorticosteroids.
